# Supplementary material
Source: PubMed Central journal article supplement (PMC3594087)
Supplement: NIHMS404806-supplement-1.pdf [file NIHMS404806-supplement-1.pdf]

## Supplementary Material

### Supplementary Table S1.

#### Pancreatic endocrine tumor tissues in TMA and mutational analyses

| <b>Patient No.</b> | <b>TMA Tissue</b>                                             | <b>Mutational Analysis Tissue</b> |
|--------------------|---------------------------------------------------------------|-----------------------------------|
| 1                  | Pancreas primary<br>Liver metastasis                          | Pancreas primary                  |
| 2                  | Lymph node metastasis<br>Liver metastasis                     | Pancreas primary                  |
| 3                  | Pancreas primary                                              | ---                               |
| 4                  | Pancreas primary<br>Lymph node metastasis<br>Liver metastasis | Pancreas primary                  |
| 5                  | Pancreas primary<br>Diaphragm metastasis                      | Pancreas primary                  |
| 6                  | Pancreas primary                                              | ---                               |
| 7                  | Pancreas primary<br>Liver metastasis                          | Pancreas primary                  |
| 8                  | Pancreas primary<br>Liver metastasis                          | ---                               |
| 9                  | Pancreas primary<br>Lymph node metastasis                     | Pancreas primary                  |
| 10                 | Pancreas primary<br>Liver metastasis                          | Pancreas primary                  |
| 11                 | Pancreas primary                                              | Pancreas primary                  |
| 12                 | Pancreas primary<br>Liver metastasis                          | Pancreas primary                  |
| 13                 | Pancreas primary<br>Lymph node metastasis<br>Liver metastasis | Pancreas primary                  |
| 14                 | Pancreas primary                                              | Pancreas primary                  |
| 15                 | Pancreas primary<br>Liver metastasis                          | Pancreas primary                  |
| 16                 | Pancreas primary                                              | Pancreas primary                  |
| 17                 | Pancreas primary<br>Lymph node metastasis                     | Pancreas primary                  |

|    |                                                               |                                      |
|----|---------------------------------------------------------------|--------------------------------------|
| 18 | Pancreas primary                                              | Pancreas primary                     |
| 19 | Pancreas primary                                              | ---                                  |
| 20 | Pancreas primary<br>Lymph node metastasis                     | Pancreas primary                     |
| 21 | Pancreas primary                                              | Pancreas primary                     |
| 22 | Pancreas primary                                              | Pancreas primary                     |
| 23 | Pancreas primary                                              | Pancreas primary                     |
| 24 | Pancreas primary                                              | Pancreas primary                     |
| 25 | Pancreas primary                                              | Pancreas primary                     |
| 26 | Pancreas primary<br>Liver metastasis                          | ---                                  |
| 27 | Pancreas primary<br>Duodenum metastasis                       | ---                                  |
| 28 | Liver metastasis                                              | Pancreas primary                     |
| 29 | Pancreas primary<br>Liver metastasis                          | Pancreas primary                     |
| 30 | Pancreas primary                                              | ---                                  |
| 31 | Pancreas primary<br>Liver metastasis                          | Pancreas primary                     |
| 32 | Pancreas primary<br>Liver metastasis                          | Pancreas primary                     |
| 33 | Pancreas primary<br>Duodenum metastasis                       | Pancreas primary                     |
| 34 | Pancreas primary                                              | Pancreas primary                     |
| 35 | Pancreas primary                                              | Pancreas primary                     |
| 36 | Pancreas primary<br>Lymph node metastasis<br>Liver metastasis | Pancreas primary<br>Liver metastasis |
| 37 | Pancreas primary                                              | Pancreas primary                     |
| 38 | Pancreas primary                                              | Pancreas primary                     |
| 39 | Pancreas primary                                              | ---                                  |
| 40 | Pancreas primary                                              | Pancreas primary                     |
| 41 | Pancreas primary                                              | ---                                  |
| 42 | Pancreas primary                                              | Pancreas primary                     |
| 43 | Pancreas primary                                              | Pancreas primary                     |
| 44 | Liver metastasis                                              | Pancreas primary                     |

## Supplementary Table S2.

## Immunohistochemical antibodies

---

| <b>Antibody</b> | <b>Catalog Number (Source)</b>                 | <b>P/M*</b> | <b>Dilution</b> |
|-----------------|------------------------------------------------|-------------|-----------------|
| EGFR            | sc-03 (Santa Cruz; Santa Cruz, CA)             | P           | 1:50            |
| PDGFRA          | 20R-PR008 (Fitzgerald Industries; Concord, MA) | P           | 1:50            |
| VEGFR1          | ab32152 (Abcam; Cambridge, MA).                | M           | 1:100           |
| mTOR            | ab32028 (Abcam)                                | M           | 1:1000          |
| IGF1R           | 3027 (Cell Signaling; Danvers, MA)             | P           | 1:50            |
| Hsp90           | 4874 (Cell Signaling)                          | P           | 1:50            |
| TGFBR1          | sc-398 (Santa Cruz)                            | P           | 1:50            |
| SSTR2A          | NB100-74537 (Novus Biologicals; Littleton, CO) | P           | 1:1500          |
| SSTR5           | ab28618 (Abcam)                                | P           | 1:1000          |
| MGMT            | MS-470-P (Thermo Scientific; Fremont, CA)      | M           | 1:50            |

---

\*P/M, polyclonal/monoclonal. The epitope retrieval method was steam EDTA for all antigens.
